# Supplementary material
Source: HighWire-hosted journal article supplement (https://www.cmaj.ca/highwire/filestream/150211/field_highwire_adjunct_files/0/231262-res-1-at.pdf)
Supplement: 231262-res-1-at.pdf [file 231262-res-1-at.pdf]

**Table S1. The proportional hazards assumption for the models**

| <b>Outcomes</b>             | <b>Hcy<br/>(N=2650)<br/>≤12.9μmol/L</b> | <b>Hcy<br/>(N=2790)<br/>&gt;12.9μmol/L</b> |
|-----------------------------|-----------------------------------------|--------------------------------------------|
| New stroke                  | 0.90                                    | 0.26                                       |
| Stroke within 30 days       | 0.49                                    | 0.32                                       |
| Composite vascular events   | 0.61                                    | 0.26                                       |
| Ischemic stroke             | 0.91                                    | 0.31                                       |
| Disabling stroke            | 0.10                                    | 0.26                                       |
| Severe or moderate bleeding | 0.15                                    | 0.24                                       |
| Any bleeding                | 0.93                                    | 0.10                                       |
| Fatal bleeding              | NA                                      | 0.09                                       |
| Intracranial hemorrhage     | NA                                      | 0.09                                       |
| Mild bleeding               | 0.71                                    | 0.09                                       |
| Mortality                   | 0.91                                    | 0.70                                       |

Hcy denotes homocysteine.

The proportional hazards assumption was tested by Schoenfeld residuals

**Table S2. Baseline Characteristics of Included and Excluded Patients**

| Characteristics                                                        | Excluded<br>(n=972) | Included<br>(n=5440) | P value |
|------------------------------------------------------------------------|---------------------|----------------------|---------|
| Median age (IQR) -yr                                                   | 65.7(58.3-72.7)     | 64.5(56.7-71.2)      | <0.001  |
| Female sex - no. (%)                                                   | 358 (36.8)          | 1812 (33.3)          | 0.03    |
| Han ethnicity - no. (%)                                                | 955 (98.3)          | 5327 (97.9)          | 0.50    |
| Median blood pressure (IQR) - mm Hg                                    |                     |                      |         |
| Systolic                                                               | 148(134-163)        | 148(136-161)         | 0.94    |
| Diastolic                                                              | 86(79-95)           | 86(80-95)            | 0.46    |
| Medical history - no. (%)                                              |                     |                      |         |
| Hypertension                                                           | 588 (60.5)          | 3367 (61.9)          | 0.41    |
| Diabetes mellitus                                                      | 239 (24.6)          | 1324 (24.3)          | 0.87    |
| Dyslipidemia                                                           | 82 (8.4)            | 532 (9.8)            | 0.19    |
| Previous ischemic stroke                                               | 177 (18.2)          | 1173 (21.6)          | 0.02    |
| Previous TIA                                                           | 13 (1.3)            | 75 (1.4)             | 0.92    |
| Myocardial infarction                                                  | 15 (1.5)            | 81 (1.5)             | 0.90    |
| Current smoking - no. (%)                                              | 254 (26.1)          | 1727 (31.7)          | <0.001  |
| CYP2C19 LOF allele carriers - no. (%)                                  |                     |                      |         |
| Intermediate metabolizers                                              | 759 (78.1)          | 4242 (78.0)          | 0.94    |
| Poor metabolizers                                                      | 213 (21.9)          | 1198 (22.0)          |         |
| Median time from symptom onset to randomization, n (%)                 |                     |                      |         |
| <12 h                                                                  | 432 (44.4)          | 2194 (40.3)          | 0.02    |
| ≥12 h                                                                  | 540 (55.6)          | 3246 (59.7)          |         |
| Qualifying event - no. (%)                                             |                     |                      |         |
| Ischemic stroke                                                        | 810 (83.3)          | 4348 (79.9)          | 0.01    |
| TIA                                                                    | 162 (16.7)          | 1092 (20.1)          |         |
| Median NIHSS score in patients with qualifying ischemic stroke (IQR) * | 2(1-3)              | 2(1-3)               | 0.10    |

Appendix 1, as supplied by the authors. Appendix to: Wang A, Tian X, Xie X, et al. Differential effect of ticagrelor versus clopidogrel by homocysteine levels on risk of recurrent stroke: a post hoc analysis of the CHANCE-2 trial. *CMAJ* 2024. doi: 10.1503/cmaj.231262. Copyright © 2024 The Author(s) or their employer(s). To receive this resource in an accessible format, please contact us at [cmajgroup@cmaj.ca](mailto:cmajgroup@cmaj.ca).

|                                                                                   |            |             |      |
|-----------------------------------------------------------------------------------|------------|-------------|------|
| Median ABCD <sup>2</sup> score in patients with qualifying TIA (IQR) <sup>†</sup> | 5(4-5)     | 4(4-5)      | 0.42 |
| Previous antiplatelet therapy - no. (%) <sup>‡</sup>                              | 91 (9.4)   | 657 (12.1)  | 0.02 |
| Previous lipid-lowering therapy - no. (%) <sup>‡</sup>                            | 64 (6.6)   | 435 (8.0)   | 0.13 |
| Symptomatic ICAS, n (%)                                                           | 353 (40.5) | 2032 (40.2) | 0.88 |
| Symptomatic ECAS, n (%)                                                           | 79 (9.1)   | 445 (8.8)   | 0.81 |
| Stroke within 90 days                                                             | 68 (7.0)   | 366 (6.7)   | 0.76 |

ECAS denotes extracranial artery stenosis. ICAS denotes intracranial artery stenosis.

IQR denotes interquartile range. LOF denotes loss-of-function. TIA denotes transient ischemic attack.

\* National Institutes of Health Stroke Scale (NIHSS) scores range from 0 to 42, with higher scores indicating more severe stroke.

† ABCD<sup>2</sup> score assesses the risk of stroke on the basis of age, blood pressure, clinical features, duration of TIA, and presence or absence of diabetes, with scores ranging from 0 to 7 and higher scores indicating greater risk.

‡ Medication within 1 month before symptom onset.

**Table S3. Efficacy and Safety Outcomes of Patients With Different Antiplatelet Therapies Stratified by Hcy Adjusted for Renal Function**

| Outcomes                   | Hcy ≤12.9μmol/L (n=2650)                                 |                                                           |                 |            | Hcy ≥12.9μmol/L (n=2790)                                 |                                                         |                 |            | P <sub>int</sub> |  |
|----------------------------|----------------------------------------------------------|-----------------------------------------------------------|-----------------|------------|----------------------------------------------------------|---------------------------------------------------------|-----------------|------------|------------------|--|
|                            | Ticagrelor<br>-Aspirin<br>Event rate<br>(%)*<br>(n=1349) | Clopidogrel<br>-Aspirin<br>Event rate<br>(%)*<br>(n=1301) | HR (95%CI)      | P<br>value | Ticagrelor<br>-Aspirin<br>Event rate<br>(%)*<br>(n=1391) | Clopidogrel<br>-Aspirin<br>Event rate<br>(%)*<br>(1399) | HR (95%CI)      | P<br>value |                  |  |
| <b>Primary outcome</b>     |                                                          |                                                           |                 |            |                                                          |                                                         |                 |            |                  |  |
| Stroke                     | 86 (6.4)                                                 | 87 (6.7)                                                  | 1.05(0.72-1.53) | 0.80       | 74 (5.3)                                                 | 119 (8.5)                                               | 0.60(0.42-0.85) | <0.001     | 0.04             |  |
| <b>Secondary outcome</b>   |                                                          |                                                           |                 |            |                                                          |                                                         |                 |            |                  |  |
| Stroke within 30 days      | 72 (5.3)                                                 | 74 (5.7)                                                  | 0.98(0.65-1.47) | 0.92       | 58 (4.2)                                                 | 98 (7.0)                                                | 0.55(0.37-0.82) | <0.001     | 0.06             |  |
| Composite vascular events† | 96 (7.1)                                                 | 114 (8.8)                                                 | 0.99(0.69-1.41) | 0.96       | 95 (6.8)                                                 | 134 (9.6)                                               | 0.61(0.43-0.85) | <0.001     | 0.07             |  |
| Ischemic stroke            | 86 (6.4)                                                 | 85 (6.5)                                                  | 1.09(0.74-1.60) | 0.67       | 72 (5.2)                                                 | 116 (8.3)                                               | 0.58(0.41-0.84) | <0.001     | 0.02             |  |
| Disabling stroke‡          | 44 (3.3)                                                 | 33 (2.5)                                                  | 1.31(0.74-2.33) | 0.35       | 36 (2.6)                                                 | 43 (3.1)                                                | 0.99(0.57-1.74) | 0.98       | 0.55             |  |
| Ordinal stroke or TIA§     |                                                          |                                                           | 0.81(0.61-1.08) | 0.15       |                                                          |                                                         | 0.71(0.54-0.93) | 0.01       | 0.20             |  |
| Fatal stroke (mRS 6)       | 2 (0.2)                                                  | 3 (0.2)                                                   |                 |            | 1 (0.1)                                                  | 3 (0.2)                                                 |                 |            |                  |  |
| Severe stroke              | 14 (1.0)                                                 | 7 (0.5)                                                   |                 |            | 11 (0.8)                                                 | 8 (0.6)                                                 |                 |            |                  |  |

|                                 |                |             |                  |        |                |             |                 |        |      |  |
|---------------------------------|----------------|-------------|------------------|--------|----------------|-------------|-----------------|--------|------|--|
| (mRS 4-5)                       |                |             |                  |        |                |             |                 |        |      |  |
| Moderate stroke                 | 28 (2.1)       | 23 (1.8)    |                  |        | 24 (1.7)       | 32 (2.3)    |                 |        |      |  |
| (mRS 2-3)                       |                |             |                  |        |                |             |                 |        |      |  |
| Mild stroke                     | 42 (3.1)       | 54 (4.2)    |                  |        | 38 (2.7)       | 76 (5.4)    |                 |        |      |  |
| (mRS 0-1)                       |                |             |                  |        |                |             |                 |        |      |  |
| TIA                             | 9 (0.6)        | 25 (1.9)    |                  |        | 20 (1.4)       | 11 (0.8)    |                 |        |      |  |
| No stroke or TIA                | 1255<br>(93.0) | 1189 (91.4) |                  |        | 1297<br>(93.2) | 1269 (90.7) |                 |        |      |  |
| <b>Primary safety outcome</b>   |                |             |                  |        |                |             |                 |        |      |  |
| Severe or moderate<br>bleeding¶ | 3 (0.2)        | 2 (0.2)     | 1.72(0.28-10.49) | 0.56   | 6 (0.4)        | 6 (0.4)     | 0.74(0.12-4.47) | 0.74   | 0.72 |  |
| Fatal bleeding                  | 1 (0.1)        | 0 (0.0)     | NA               | NA     | 2 (0.1)        | 3 (0.2)     | 0.51(0.05-5.71) | 0.59   | 1.00 |  |
| Intracranial<br>hemorrhage      | 0 (0.0)        | 2 (0.2)     | NA               | NA     | 3 (0.2)        | 4 (0.3)     | 1.13(0.16-8.07) | 0.90   | 0.99 |  |
| Secondary safety<br>outcome     |                |             |                  |        |                |             |                 |        |      |  |
| Any bleeding                    | 76 (5.6)       | 34 (2.6)    | 2.33(1.36-3.99)  | <0.001 | 77 (5.5)       | 32 (2.3)    | 2.59(1.51-4.43) | <0.001 | 0.78 |  |
| Mild bleeding ¶                 | 73 (5.4)       | 32 (2.5)    | 2.43(1.38-4.27)  | <0.001 | 71 (5.1)       | 26 (1.9)    | 2.92(1.65-5.18) | <0.001 | 0.68 |  |
| Mortality                       | 3 (0.2)        | 4 (0.3)     | 0.40(0.04-4.63)  | 0.47   | 4 (0.3)        | 10 (0.7)    | 0.42(0.08-2.17) | 0.30   | 0.87 |  |

CI denotes confidence interval. Hcy denotes homocysteine. HR denotes hazard ratio. mRS denotes modified Rankin Scale. NA denotes not

applicable. TIA denotes transient ischemic attack.

\* Event rates for ordinal stroke or TIA are raw estimates, whereas event rates for other outcomes are Kaplan-Meier estimates of the percentage of patients with events at 90 days.

† Composite vascular events include ischemic stroke, hemorrhagic stroke, TIA, myocardial infarction, vascular death.

‡ A stroke defined as disabling if the patient had a subsequent score on the modified Rankin scale of greater than 1 (indicating death or any degree of disability).

§ Severity measured using a six-level ordered categorical scale that incorporates subsequent stroke or TIA events and mRS score at 3 months.

The common odds ratio is shown rather than the hazard ratio.

¶ Severe or moderate bleeding and mild bleeding were defined according to GUSTO (Global Utilization of Streptokinase and Tissue Plasminogen Activator for Occluded Coronary Arteries) criteria.

**Table S4. Efficacy and Safety Outcomes of Patients With Different Antiplatelet Therapies Stratified by Hcy and Sex**

| Outcomes                   | Sex    | Hcy levels     | Ticagrelor<br>-Aspirin<br>Event rate (%)* | Clopidogrel<br>-Aspirin<br>Event rate (%)* | HR (95%CI)      | <i>P</i> <sub>int</sub> |
|----------------------------|--------|----------------|-------------------------------------------|--------------------------------------------|-----------------|-------------------------|
| Stroke                     | Female | Hcy≤12.9μmol/L | 44 (7.4)                                  | 36 (6.0)                                   | 1.29(0.80-2.09) | 0.007                   |
|                            |        | Hcy>12.9μmol/L | 16 (4.9)                                  | 30 (10.2)                                  | 0.45(0.22-0.90) |                         |
|                            | Male   | Hcy≤12.9μmol/L | 42 (5.6)                                  | 51 (7.3)                                   | 0.77(0.50-1.19) | 0.75                    |
|                            |        | Hcy>12.9μmol/L | 58 (5.4)                                  | 89 (8.1)                                   | 0.64(0.45-0.89) |                         |
| Stroke within 30 days      | Female | Hcy≤12.9μmol/L | 37 (6.2)                                  | 32 (5.4)                                   | 1.25(0.75-2.08) | 0.02                    |
|                            |        | Hcy>12.9μmol/L | 13 (4.0)                                  | 27 (9.2)                                   | 0.47(0.22-0.99) |                         |
|                            | Male   | Hcy≤12.9μmol/L | 35 (4.6)                                  | 42 (6.0)                                   | 0.79(0.49-1.27) | 0.66                    |
|                            |        | Hcy>12.9μmol/L | 45 (4.2)                                  | 71 (6.4)                                   | 0.61(0.42-0.90) |                         |
| Composite vascular events† | Female | Hcy≤12.9μmol/L | 49 (8.2)                                  | 53 (8.9)                                   | 0.98(0.65-1.50) | 0.04                    |
|                            |        | Hcy>12.9μmol/L | 22 (6.7)                                  | 37 (12.6)                                  | 0.55(0.30-1.01) |                         |

|                             |                         |                             |                             |           |                 |                  |      |
|-----------------------------|-------------------------|-----------------------------|-----------------------------|-----------|-----------------|------------------|------|
| Ischemic stroke             | Male                    | Hcy $\leq$ 12.9 $\mu$ mol/L | 47 (6.2)                    | 61 (8.7)  | 0.74(0.49-1.11) | 0.61             |      |
|                             |                         | Hcy $>$ 12.9 $\mu$ mol/L    | 73 (6.9)                    | 97 (8.8)  | 0.73(0.53-1.00) |                  |      |
|                             | Female                  | Hcy $\leq$ 12.9 $\mu$ mol/L | 44 (7.4)                    | 35 (5.9)  | 1.33(0.82-2.16) | 0.006            |      |
|                             |                         | Hcy $>$ 12.9 $\mu$ mol/L    | 16 (4.9)                    | 30 (10.2) | 0.45(0.22-0.90) |                  |      |
| Disabling stroke $\ddagger$ | Male                    | Hcy $\leq$ 12.9 $\mu$ mol/L | 42 (5.6)                    | 50 (7.1)  | 0.79(0.51-1.21) | 0.69             |      |
|                             |                         | Hcy $>$ 12.9 $\mu$ mol/L    | 56 (5.3)                    | 86 (7.8)  | 0.63(0.45-0.89) |                  |      |
|                             | Female                  | Hcy $\leq$ 12.9 $\mu$ mol/L | 19 (3.2)                    | 10 (1.7)  | 1.87(0.83-4.23) | 0.02             |      |
|                             |                         | Hcy $>$ 12.9 $\mu$ mol/L    | 7 (2.1)                     | 16 (5.4)  | 0.47(0.18-1.22) |                  |      |
| Ordinal stroke or TIA $\S$  | Male                    | Hcy $\leq$ 12.9 $\mu$ mol/L | 25 (3.3)                    | 23 (3.3)  | 0.99(0.55-1.81) | 0.64             |      |
|                             |                         | Hcy $>$ 12.9 $\mu$ mol/L    | 29 (2.7)                    | 27 (2.4)  | 1.02(0.60-1.74) |                  |      |
|                             | Fatal stroke<br>(mRS 6) | Female                      | Hcy $\leq$ 12.9 $\mu$ mol/L | 0 (0.0)   | 1 (0.2)         | 0.93(0.62-1.41)  | 0.15 |
|                             |                         |                             | Hcy $>$ 12.9 $\mu$ mol/L    | 4 (1.2)   | 3 (1.0)         | 0.56 (0.32-0.99) |      |



|                              |        |                             |          |          |                  |      |
|------------------------------|--------|-----------------------------|----------|----------|------------------|------|
| Severe stroke<br>(mRS 4-5)   | Male   | Hcy $\leq$ 12.9 $\mu$ mol/L | 2 (0.3)  | 2 (0.3)  | 0.72 (0.49-1.07) | 0.85 |
|                              |        | Hcy $>$ 12.9 $\mu$ mol/L    | 1 (0.1)  | 3 (0.3)  | 0.76 (0.55-1.04) |      |
|                              | Female | Hcy $\leq$ 12.9 $\mu$ mol/L | 7 (1.2)  | 2 (0.3)  |                  |      |
|                              |        | Hcy $>$ 12.9 $\mu$ mol/L    | 3 (0.9)  | 13 (4.4) |                  |      |
| Moderate stroke<br>(mRS 2-3) | Male   | Hcy $\leq$ 12.9 $\mu$ mol/L | 7 (0.7)  | 5 (0.7)  |                  |      |
|                              |        | Hcy $>$ 12.9 $\mu$ mol/L    | 7 (0.7)  | 5 (0.5)  |                  |      |
|                              | Female | Hcy $\leq$ 12.9 $\mu$ mol/L | 12 (2.0) | 7 (1.2)  |                  |      |
|                              |        | Hcy $>$ 12.9 $\mu$ mol/L    | 9 (2.8)  | 14 (4.8) |                  |      |
| Mild stroke<br>(mRS 0-1)     | Male   | Hcy $\leq$ 12.9 $\mu$ mol/L | 16 (2.1) | 16 (2.3) |                  |      |
|                              |        | Hcy $>$ 12.9 $\mu$ mol/L    | 21 (2.0) | 19 (1.7) |                  |      |
|                              | Female | Hcy $\leq$ 12.9 $\mu$ mol/L | 25 (4.2) | 26 (4.4) |                  |      |
|                              |        | Hcy $>$ 12.9 $\mu$ mol/L    | 9 (2.8)  | 14 (4.8) |                  |      |
|                              | Male   | Hcy $\leq$ 12.9 $\mu$ mol/L | 17 (2.2) | 28 (4.0) |                  |      |

|                              |        |                |            |             |                  |      |
|------------------------------|--------|----------------|------------|-------------|------------------|------|
|                              |        | Hcy>12.9μmol/L | 29 (2.7)   | 62 (5.6)    |                  |      |
| TIA                          | Female | Hcy≤12.9μmol/L | 3 (0.5)    | 16 (2.7)    |                  |      |
|                              |        | Hcy>12.9μmol/L | 6 (1.8)    | 3 (1.0)     |                  |      |
|                              | Male   | Hcy≤12.9μmol/L | 5 (0.7)    | 9 (1.3)     |                  |      |
|                              |        | Hcy>12.9μmol/L | 14 (1.3)   | 8 (0.7)     |                  |      |
| No stroke or TIA             | Female | Hcy≤12.9μmol/L | 547 (92.1) | 546 (91.3)  |                  |      |
|                              |        | Hcy>12.9μmol/L | 304 (93.3) | 261 (88.8)  |                  |      |
|                              | Male   | Hcy≤12.9μmol/L | 708 (93.4) | 643 (91.5)  |                  |      |
|                              |        | Hcy>12.9μmol/L | 993 (93.2) | 1008 (91.2) |                  |      |
| Severe or moderate bleeding¶ | Female | Hcy≤12.9μmol/L | 1 (0.2)    | 1 (0.2)     | 1.18(0.07-18.99) | 1.00 |
|                              |        | Hcy>12.9μmol/L | 0 (0.0)    | 0 (0.0)     | NA               |      |
|                              | Male   | Hcy≤12.9μmol/L | 2 (0.3)    | 1 (0.1)     | 1.84(0.17-20.40) | 0.67 |
|                              |        | Hcy>12.9μmol/L | 6 (0.6)    | 6 (0.5)     | 0.87(0.26-2.88)  |      |

|                         |        |                             |          |          |                  |      |
|-------------------------|--------|-----------------------------|----------|----------|------------------|------|
| Fatal bleeding          | Female | Hcy $\leq$ 12.9 $\mu$ mol/L | 0 (0.0)  | 1 (0.2)  | NA               | NA   |
|                         |        | Hcy $>$ 12.9 $\mu$ mol/L    | 0 (0.0)  | 0 (0.0)  | NA               |      |
|                         | Male   | Hcy $\leq$ 12.9 $\mu$ mol/L | 1 (0.1)  | 0 (0.0)  | NA               | 1.00 |
|                         |        | Hcy $>$ 12.9 $\mu$ mol/L    | 2 (0.2)  | 3 (0.3)  | 0.81(0.14-4.88)  |      |
| Intracranial hemorrhage | Female | Hcy $\leq$ 12.9 $\mu$ mol/L | 0 (0.0)  | 0 (0.0)  | NA               | NA   |
|                         |        | Hcy $>$ 12.9 $\mu$ mol/L    | 1 (0.2)  | 0 (0.0)  | NA               |      |
|                         | Male   | Hcy $\leq$ 12.9 $\mu$ mol/L | 0 (0.0)  | 1 (0.1)  | 0.00(0.00-.)     | 1.00 |
|                         |        | Hcy $>$ 12.9 $\mu$ mol/L    | 3 (0.3)  | 4 (0.4)  | 0.75(0.16-3.42)  |      |
| Any bleeding¶           | Female | Hcy $\leq$ 12.9 $\mu$ mol/L | 41 (6.9) | 15 (2.5) | 2.59(1.35-4.96)  | 0.64 |
|                         |        | Hcy $>$ 12.9 $\mu$ mol/L    | 20 (6.1) | 6 (2.0)  | 5.76(1.63-20.37) |      |
|                         | Male   | Hcy $\leq$ 12.9 $\mu$ mol/L | 35 (4.6) | 19 (2.7) | 2.13(1.16-3.91)  | 0.88 |
|                         |        | Hcy $>$ 12.9 $\mu$ mol/L    | 57 (5.4) | 26 (2.4) | 2.26(1.39-3.68)  |      |
| Mild bleeding¶          | Female | Hcy $\leq$ 12.9 $\mu$ mol/L | 40 (6.7) | 14 (2.3) | 2.74(1.40-5.36)  | 0.71 |

|          |        |                |          |          |                  |      |
|----------|--------|----------------|----------|----------|------------------|------|
|          |        | Hcy>12.9μmol/L | 20 (6.1) | 6 (2.0)  | 5.76(1.63-20.37) |      |
|          | Male   | Hcy≤12.9μmol/L | 33 (4.4) | 18 (2.6) | 2.15(1.15-4.04)  | 0.95 |
|          |        | Hcy>12.9μmol/L | 51 (4.8) | 20 (1.8) | 2.72(1.57-4.70)  |      |
| Morality | Female | Hcy≤12.9μmol/L | 1 (0.2)  | 2 (0.3)  | 0.48(0.04-5.43)  | 1.00 |
|          |        | Hcy>12.9μmol/L | 0 (0.0)  | 4 (1.4)  | NA               |      |
|          | Male   | Hcy≤12.9μmol/L | 2 (0.3)  | 2 (0.3)  | 1.14(0.15-8.70)  | 0.74 |
|          |        | Hcy>12.9μmol/L | 4 (0.4)  | 6 (0.5)  | 0.67(0.19-2.40)  |      |

CI denotes confidence interval. Hcy denotes homocysteine. HR denotes hazard ratio. mRS denotes modified Rankin Scale. NA denotes not applicable. TIA denotes transient ischemic attack.

\* Event rates for ordinal stroke or TIA are raw estimates, whereas event rates for other outcomes are Kaplan-Meier estimates of the percentage of patients with events at 90 days.

† Composite vascular events include ischemic stroke, hemorrhagic stroke, TIA, myocardial infarction, vascular death.

‡ A stroke defined as disabling if the patient had a subsequent score on the modified Rankin scale of greater than 1 (indicating death or any

degree of disability).

§ Severity measured using a six-level ordered categorical scale that incorporates subsequent stroke or TIA events and mRS score at 3 months.

The common odds ratio is shown rather than the hazard ratio.

¶ Severe or moderate bleeding and mild bleeding were defined according to GUSTO (Global Utilization of Streptokinase and Tissue Plasminogen Activator for Occluded Coronary Arteries) criteria.

**Table S5. Efficacy and Safety Outcomes of Patients With Different Antiplatelet Therapies Stratified by Hcy and *CYP2C19* Loss-of-function Allele Carriers**

| Outcomes                   | <i>CYP2C19</i><br>metabolizers | Hcy levels     | Ticagrelor<br>-Aspirin<br>Event rate (%)* | Clopidogrel<br>-Aspirin<br>Event rate (%)* | HR (95%CI)      | <i>P</i> int |
|----------------------------|--------------------------------|----------------|-------------------------------------------|--------------------------------------------|-----------------|--------------|
| Stroke                     | Intermediate                   | Hcy≤12.9μmol/L | 63 (6.0)                                  | 69 (6.8)                                   | 0.90(0.58-1.37) | 0.10         |
|                            |                                | Hcy>12.9μmol/L | 58 (5.4)                                  | 91 (8.3)                                   | 0.52(0.35-0.79) |              |
|                            | Poor                           | Hcy≤12.9μmol/L | 23 (7.8)                                  | 18 (6.5)                                   | 2.66(0.91-7.75) | 0.10         |
|                            |                                | Hcy>12.9μmol/L | 16(5.0)                                   | 28 (9.2)                                   | 0.79(0.35-1.78) |              |
| Stroke within 30 days      | Intermediate                   | Hcy≤12.9μmol/L | 54(5.1)                                   | 57 (5.6)                                   | 0.89(0.56-1.41) | 0.15         |
|                            |                                | Hcy>12.9μmol/L | 47 (4.4)                                  | 73 (6.7)                                   | 0.51(0.32-0.80) |              |
|                            | Poor                           | Hcy≤12.9μmol/L | 18 (6.1)                                  | 17(6.1)                                    | 1.65(0.51-5.32) | 0.21         |
|                            |                                | Hcy>12.9μmol/L | 11 (3.4)                                  | 25 (8.2)                                   | 0.69(0.28-1.71) |              |
| Composite vascular events† | Intermediate                   | Hcy≤12.9μmol/L | 70 (6.6)                                  | 91 (8.9)                                   | 0.84(0.56-1.26) | 0.16         |
|                            |                                | Hcy>12.9μmol/L | 71 (6.6)                                  | 104(9.5)                                   | 0.52(0.35-0.77) |              |

|                        |              |                             |          |          |                  |      |
|------------------------|--------------|-----------------------------|----------|----------|------------------|------|
| Ischemic stroke        | Poor         | Hcy $\leq$ 12.9 $\mu$ mol/L | 26 (8.8) | 23 (8.2) | 2.10(0.81-5.47)  | 0.26 |
|                        |              | Hcy>12.9 $\mu$ mol/L        | 24 (7.5) | 30 (9.9) | 0.93(0.44-1.97)  |      |
|                        | Intermediate | Hcy $\leq$ 12.9 $\mu$ mol/L | 63 (6.0) | 68 (6.7) | 0.91(0.59-1.40)  | 0.08 |
|                        |              | Hcy>12.9 $\mu$ mol/L        | 56 (5.2) | 88 (8.0) | 0.51(0.33-0.77)  |      |
| Disabling stroke‡      | Poor         | Hcy $\leq$ 12.9 $\mu$ mol/L | 23 (7.8) | 17(6.1)  | 3.43(1.07-10.97) | 0.07 |
|                        |              | Hcy>12.9 $\mu$ mol/L        | 16(5.0)  | 28 (9.2) | 0.79(0.35-1.78)  |      |
|                        | Intermediate | Hcy $\leq$ 12.9 $\mu$ mol/L | 28 (2.7) | 27 (2.6) | 0.98(0.51-1.90)  | 0.76 |
|                        |              | Hcy>12.9 $\mu$ mol/L        | 29 (2.7) | 29 (2.6) | 1.02(0.53-1.95)  |      |
| Ordinal stroke or TIA§ | Poor         | Hcy $\leq$ 12.9 $\mu$ mol/L | 16(5.4)  | 6(2.2)   | 4.63(0.96-22.42) | 0.09 |
|                        |              | Hcy>12.9 $\mu$ mol/L        | 7(2.2)   | 14 (4.6) | 0.70(0.21-2.38)  |      |
| Fatal stroke(mRS 6)    | Intermediate | Hcy $\leq$ 12.9 $\mu$ mol/L | 1 (0.1)  | 3 (0.3)  | 0.76(0.55-1.05)  | 0.69 |
|                        |              | Hcy>12.9 $\mu$ mol/L        | 1 (0.1)  | 3 (0.3)  | 0.69(0.50-0.95)  |      |

| Stroke severity           | Stratification | Hcy level         | Events (n) | Events (%) | HR (95% CI)      | P-value |
|---------------------------|----------------|-------------------|------------|------------|------------------|---------|
| Severe stroke (mRS 4-5)   | Poor           | Hcy ≤ 12.9 μmol/L | 1 (0.3)    | 0 (0.0)    | 1.02 (0.56-1.86) | 0.46    |
|                           |                | Hcy > 12.9 μmol/L | 0 (0.0)    | 0 (0.0)    | 0.75 (0.42-1.32) |         |
|                           | Intermediate   | Hcy ≤ 12.9 μmol/L | 9 (0.9)    | 5 (0.5)    |                  |         |
|                           |                | Hcy > 12.9 μmol/L | 10 (0.9)   | 5 (0.5)    |                  |         |
| Moderate stroke (mRS 2-3) | Poor           | Hcy ≤ 12.9 μmol/L | 5 (1.7)    | 2 (0.7)    |                  |         |
|                           |                | Hcy > 12.9 μmol/L | 1 (0.3)    | 3 (1.0)    |                  |         |
|                           | Intermediate   | Hcy ≤ 12.9 μmol/L | 18 (1.7)   | 19 (1.9)   |                  |         |
|                           |                | Hcy > 12.9 μmol/L | 18 (1.7)   | 21 (1.9)   |                  |         |
| Mild stroke (mRS 0-1)     | Poor           | Hcy ≤ 12.9 μmol/L | 10 (3.4)   | 4 (1.4)    |                  |         |
|                           |                | Hcy > 12.9 μmol/L | 6 (1.9)    | 11 (0.6)   |                  |         |
|                           | Intermediate   | Hcy ≤ 12.9 μmol/L | 35 (3.3)   | 42 (4.1)   |                  |         |
|                           |                | Hcy > 12.9 μmol/L | 29 (2.7)   | 62 (5.7)   |                  |         |
|                           | Poor           | Hcy ≤ 12.9 μmol/L | 7 (2.4)    | 12 (4.3)   |                  |         |



|                              |              |                | Number of events (%) | Number of events (%) | HR (95% CI)       | P    |
|------------------------------|--------------|----------------|----------------------|----------------------|-------------------|------|
| TIA                          | Intermediate | Hcy>12.9µmol/L | 9(2.8)               | 14 (4.6)             |                   |      |
|                              |              | Hcy≤12.9µmol/L | 7(0.7)               | 20 (2.0)             |                   |      |
|                              | Poor         | Hcy>12.9µmol/L | 12(1.1)              | 10(0.9)              |                   |      |
|                              |              | Hcy≤12.9µmol/L | 1 (0.3)              | 5(1.8)               |                   |      |
| No stroke or TIA             | Intermediate | Hcy>12.9µmol/L | 8(2.5)               | 1 (0.3)              |                   |      |
|                              |              | Hcy≤12.9µmol/L | 983 (93.4)           | 933(91.3)            |                   |      |
|                              | Poor         | Hcy>12.9µmol/L | 1002(93.5)           | 994 (90.8)           |                   |      |
|                              |              | Hcy≤12.9µmol/L | 272(91.9)            | 256(91.8)            |                   |      |
| Severe or moderate bleeding¶ | Intermediate | Hcy>12.9µmol/L | 295 (92.5)           | 275 (90.5)           |                   |      |
|                              |              | Hcy≤12.9µmol/L | 2 (0.2)              | 1 (0.1)              | 2.03(0.18-23.13)  | 0.70 |
|                              | Poor         | Hcy>12.9µmol/L | 5 (0.5)              | 6 (0.5)              | 0.71(0.12-4.36)   |      |
|                              |              | Hcy≤12.9µmol/L | 1 (0.3)              | 1 (0.4)              | 5.06(0.08-337.28) | NA   |
|                              |              | Hcy>12.9µmol/L | 1 (0.3)              | 0 (0.0)              | NA                | NA   |

|                            |              |                             |          |          |                  |      |
|----------------------------|--------------|-----------------------------|----------|----------|------------------|------|
| Fatal bleeding             | Intermediate | Hcy $\leq$ 12.9 $\mu$ mol/L | 1 (0.1)  | 0 (0.0)  | NA               | NA   |
|                            |              | Hcy $>$ 12.9 $\mu$ mol/L    | 1 (0.1)  | 3 (0.3)  | 0.45(0.04-5.02)  |      |
|                            | Poor         | Hcy $\leq$ 12.9 $\mu$ mol/L | 1 (0.3)  | 0 (0.0)  | NA               | NA   |
|                            |              | Hcy $>$ 12.9 $\mu$ mol/L    | 0 (0.0)  | 0 (0.0)  | NA               |      |
| Intracranial hemorrhage    | Intermediate | Hcy $\leq$ 12.9 $\mu$ mol/L | 0 (0.0)  | 1 (0.1)  | NA               | 1.00 |
|                            |              | Hcy $>$ 12.9 $\mu$ mol/L    | 3 (0.3)  | 4 (0.4)  | 1.05(0.14-7.60)  |      |
|                            | Poor         | Hcy $\leq$ 12.9 $\mu$ mol/L | 0 (0.0)  | 0 (0.0)  | NA               | NA   |
|                            |              | Hcy $>$ 12.9 $\mu$ mol/L    | 0 (0.0)  | 1 (0.4)  |                  |      |
| Any bleeding <sup>¶</sup>  | Intermediate | Hcy $\leq$ 12.9 $\mu$ mol/L | 56 (5.3) | 25 (2.4) | 1.97(1.06-3.67)  | 0.63 |
|                            |              | Hcy $>$ 12.9 $\mu$ mol/L    | 65 (6.1) | 29 (2.6) | 2.50(1.40-4.48)  |      |
|                            | Poor         | Hcy $\leq$ 12.9 $\mu$ mol/L | 20 (6.8) | 9(3-2)   | 3.64(1.11-11.96) | 0.52 |
|                            |              | Hcy $>$ 12.9 $\mu$ mol/L    | 12 (3.8) | 3(1.0)   | 4.85(0.57-41.51) |      |
| Mild bleeding <sup>¶</sup> | Intermediate | Hcy $\leq$ 12.9 $\mu$ mol/L | 54(5.1)  | 24 (2.3) | 1.98(1.04-3.76)  | 0.50 |

|           |              | Hcy>12.9μmol/L | 60 (5.6) | 23(2.1) | 2.89(1.55-5.42)  |      |
|-----------|--------------|----------------|----------|---------|------------------|------|
|           | Poor         | Hcy≤12.9μmol/L | 19 (6.4) | 8(2.9)  | 4.61(1.22-17.48) | 0.59 |
|           |              | Hcy>12.9μmol/L | 11 (0.4) | 3(1.0)  | 4.85(0.57-41.51) |      |
| Mortality | Intermediate | Hcy≤12.9μmol/L | 1 (0.1)  | 4 (0.4) | 0.45(0.04-5.06)  | 0.88 |
|           |              | Hcy>12.9μmol/L | 3 (0.3)  | 9 (0.8) | 0.47(0.09-2.56)  |      |
|           | Poor         | Hcy≤12.9μmol/L | 2(0.7)   | 0 (0.0) | NA               | NA   |
|           |              | Hcy>12.9μmol/L | 1 (0.3)  | 1 (0.3) | NA               |      |

CI denotes confidence interval. Hcy denotes homocysteine. HR denotes hazard ratio. mRS denotes modified Rankin Scale. NA denotes not applicable. TIA denotes transient ischemic attack.

\* Event rates for ordinal stroke or TIA are raw estimates, whereas event rates for other outcomes are Kaplan-Meier estimates of the percentage of patients with events at 90 days.

† Composite vascular events include ischemic stroke, hemorrhagic stroke, TIA, myocardial infarction, vascular death.

‡ A stroke defined as disabling if the patient had a subsequent score on the modified Rankin scale of greater than 1 (indicating death or any

degree of disability).

§ Severity measured using a six-level ordered categorical scale that incorporates subsequent stroke or TIA events and mRS score at 3 months.

The common odds ratio is shown rather than the hazard ratio.

¶ Severe or moderate bleeding and mild bleeding were defined according to GUSTO (Global Utilization of Streptokinase and Tissue Plasminogen Activator for Occluded Coronary Arteries) criteria.
